# Supplementary material for: A randomized controlled trial comparing 2D video and virtual reality for distance learning of FAST in initial trauma care
Source: Research Square preprint supplement (doi:10.21203/rs.3.rs-8158420/v1), 2026-02-11
Supplement: Supplementary file 1 [file 54e712814d14a02a868e9469.docx]

**Supplementary table 1. The timetable of the remote lectures for 2D and VR groups**

| Schedule | Time (min) | Activity |
| --- | --- | --- |
| 12:55-13:00 | 5 | Participant check-in (2D group) |
| 13:00-13:15 | 15 | Baseline questionnaire and pre-test |
| 13:15-13:45 | 30 | Remote lecture (10 min: FAST watched in 2D) |
| 13:45-14:00 | 15 | Psychological questionnaire and post-test |
| 14:00-14:05 | 5 | Participant dismissal (2D group) |
| 14:05-14:25 | 20 | Dismissal |
| 14:25-14:30 | 5 | Participant check-in (VR group) |
| 14:30-14:45 | 15 | Baseline questionnaire and pre-test |
| 14:45-15:15 | 30 | Remote lecture (10 min: FAST watched in VR) |
| 15:15-15:30 | 15 | Psychological questionnaire and post-test |
| 15:30-15:35 | 5 | Participant dismissal (VR group) |
